# Supplementary material for: Multicolor luminescent hybrid assembled materials based on lanthanide-containing polyoxometalates free from energy transfer crosstalk
Source: Royal Society of Chemistry journal article supplement (doi:10.1039/c5ra03329b), 2015-01-01
Supplement: c5ra03329b1.pdf [file c5ra03329b1.pdf]

## Supporting Information

### 1. Synthesis procedures

#### Synthesis of 2-[2-(*N,N'*-di-*tert*-butoxycarbonylguanidino)ethoxy] ethanol (donated as BocGEE)

GEEMA was prepared according to established methods<sup>1</sup>. A solution of *N,N'*-bis(*tert*-butoxycarbonyl)-1*H*-pyrazole-1-carboximidine (4.00 g, 12.89 mmol) was added dropwise to a stirred solution of 2-(2-aminoethoxy) ethanol (1.36 g, 12.89 mmol) and *N,N*-diisopropylethylamine (4.99 g, 38.7 mmol) in DCM (50 mL). The reaction was stirred overnight at room temperature, and then washed with 0.15 N HCl, 0.15 N NaHCO<sub>3</sub>, and brine. The organic layer was dried over anhydrous Na<sub>2</sub>SO<sub>4</sub> and concentrated under reduced pressure. Silica gel column purification with DCM/EtOAc (2/1, v/v) gave the produce as a colorless oil (4.17 g, 93%). <sup>1</sup>H NMR (CDCl<sub>3</sub>, 400 MHz): δ 1.50 (s, 9H), 1.51 (s, 9H), 2.45 (br, s, OH, 1H), 3.62 (m, 4H), 3.67 (m, 2H), 3.76 (m, 2H), 8.83 (br, s, NH, 1H), 11.50 (br, s, NH, 1H).

#### Synthesis of the monomer 2-[2-(*N,N'*-di-*tert*-butoxycarbonylguanidino)ethoxy] ethyl methacrylate (donated as BocGEEMA)

The synthesis of BocGEEMA was described in our previous work<sup>1</sup>. BocGEE (4.17g, 12.00mmol) and TEA (2.5 ml, 18.00 mmol) was dissolved in 25ml anhydrous CH<sub>2</sub>Cl<sub>2</sub>. Methacryloyl chloride (1.38 g, 13.20 mmol) in anhydrous CH<sub>2</sub>Cl<sub>2</sub> was added dropwise to the flask at 0 °C under nitrogen atmosphere and stirred for 6h at room temperature. After termination of the reaction with water, the mixture was washed successively with 0.2 N HCl, 0.2 N NaHCO<sub>3</sub>, and brine. The orange organic layer was dried over anhydrous Na<sub>2</sub>SO<sub>4</sub> and concentrated under vacuum. The colorless oil product (3.89 g, 78%) was afforded with silica gel using DCM/EtOAc (15/1, v/v) as eluent. <sup>1</sup>H NMR (CDCl<sub>3</sub>, 400 MHz): δ 1.49 (s, 9H), 1.51 (s, 9H), 1.96 (s, 3H), 3.64 (m, 2H), 3.70 (m, 2H), 3.74 (t, *J* = 4.80 Hz, 2H), 4.31 (t, *J* = 4.71 Hz, 2H), 5.57 (m, 1H), 6.16 (m, 1H), 8.77 (br, s, NH, 1H), 11.48 (br, s, NH, 1H).

#### Synthesis of macro-initiator CH<sub>3</sub>O-PEO<sub>114</sub>-Br

Macro-initiator CH<sub>3</sub>O-PEO<sub>114</sub>-Br was synthesized as followed<sup>2</sup>: CH<sub>3</sub>O-PEO<sub>114</sub>-OH (15.0 g, 3.00 mmol) was dissolved in 150 ml toluene. After azeotropic distillation of 50 ml solvent, the mixture was cooled to 30 °C and added TEA (3.20 g, 30.0 mmol) and 2-bromo-2-methylpropionyl bromide (6.90 g, 30.0 mmol) subsequently. The reaction was stirred for five days. The yellowish powder was

obtained after the precipitation in a ten-fold excess of petroleum ether. Then, the crude product was redissolved in about 100 ml THF and precipitated in a ten-fold excess of petroleum ether. Successively discoloring in water with charcoal, extracting with CH<sub>2</sub>Cl<sub>2</sub>, drying over anhydrous Na<sub>2</sub>SO<sub>4</sub>, and precipitating in petroleum ether gave the purified product as a white powder. Gel permeation chromatography analysis results (polystyrene standards):  $M_{n, GPC} = 7200$  g/mol and the polydispersity index (PDI) = 1.06. <sup>1</sup>H NMR (CDCl<sub>3</sub>, 400 MHz):  $\delta$  1.94 (s, 6H; C(CH<sub>3</sub>)<sub>2</sub>Br), 3.38 (s, 3H; OCH<sub>3</sub>), 3.65 (bs, 456H; OCH<sub>2</sub>CH<sub>2</sub>O of PEO). The degree of esterification was 100% determined by <sup>1</sup>H NMR.

### **Synthesis of the CH<sub>3</sub>O-PEO<sub>114</sub>-*b*-PBocGEEMA<sub>23</sub> diblock polymers (donated as PEO<sub>114</sub>-*b*-PBGU<sub>23</sub>)**

The preparation of CH<sub>3</sub>O-PEO<sub>114</sub>-*b*-PBocGEEMA<sub>23</sub> was an ATRP procedure. Macro-initiator CH<sub>3</sub>O-PEO<sub>114</sub>-Br (0.23g,  $4.62 \times 10^{-5}$ ), monomer BocGEEMA (0.46 g,  $1.11 \times 10^{-3}$ mol), copper (I) bromide (13.24 mg,  $9.23 \times 10^{-5}$ mol), PMDETA (15.59 mg,  $9.23 \times 10^{-5}$ mol), and dry THF (3 mL) were introduced into a glass tube equipped with a magnetic stirring bar. The mixture was degassed by three freeze-vacuum-thaw cycles and the tube was sealed before initiating the polymerization at 35 °C. Three hours later, the reaction was quenched by cooling down in liquid nitrogen and introducing air. The mixture was then diluted with THF and precipitated in petroleum ether/ethyl ether (2/1, v/v). After dissolving the precipitation in CH<sub>2</sub>Cl<sub>2</sub> and washing with EDTA solution twice, the copper catalyst was removed. The organic layer was dried over Na<sub>2</sub>SO<sub>4</sub>, concentrated under reduced pressure, dissolved in 10 ml THF, and precipitated in petroleum ether/ethyl ether (2/1, v/v). Polymer was afforded as a white power after drying under vacuum. Gel permeation chromatography analysis results (polystyrene standards):  $M_{n, GPC} = 13600$  g/mol and the polydispersity index (PDI) = 1.14. <sup>1</sup>H NMR (CDCl<sub>3</sub>, 400 MHz):  $\delta$  (ppm), 0.96 (m, 3H; CH<sub>3</sub>), 1.49 (s, 18 H, (CH<sub>3</sub>)<sub>3</sub>C), 1.85 (m, 2H; CH<sub>2</sub>), 3.38 (s, 0.13; OCH<sub>3</sub>), 3.65 (bs, 26H; OCH<sub>2</sub>CH<sub>2</sub>O of both EO and BocGEEMA units), 4.09 (s, 2H, COOCH<sub>2</sub>), 8.58 (s, 1H; NH), 11.50 (s, 1H; NH). The number of BocGEEMA units was 23, calculated from its <sup>1</sup>H NMR spectrum.

### **Synthesis of the CH<sub>3</sub>O-PEO<sub>114</sub>-*b*-PGEEMA<sub>23</sub> diblock polymers (donated as PEO<sub>114</sub>-*b*-PGU<sub>23</sub>)**

The removing of Boc-group from diblock polymer CH<sub>3</sub>O-PEO<sub>114</sub>-*b*-PBocGEEMA<sub>23</sub> ( $M_{n, GPC} = 13600$  g/mol, PDI = 1.14) was completed using trifluoroacetic acid (5 ml) in CH<sub>2</sub>Cl<sub>2</sub> (20 ml) for 6 hours at room temperature. The resulting Boc-deprotected polymer, CH<sub>3</sub>O-PEO<sub>114</sub>-*b*-PGEEMA<sub>23</sub>, was

isolated by rotary evaporation and washed with ethyl ether three times. The completeness of the deprotection was confirmed from the disappearance of the  $^1\text{H}$  NMR signal at  $\delta = 1.49$  ppm (*tert*-Boc).  $^1\text{H}$  NMR ( $\text{D}_2\text{O}$ ):  $\delta$  (ppm), 1.00 (m, 3H;  $\text{CH}_3$ ), 1.85 (m, 2H;  $\text{CH}_2$ ), 3.36 (s, 2H;  $\text{CH}_2\text{-N}$ ), 3.64 (bs, 24H;  $\text{OCH}_2\text{CH}_2\text{O}$  of both EO and GEEMA units), 4.13 (s, 2H,  $\text{COOCH}_2$ ).

## Reference

1. H. B. Wei, S. M. Du, Y. Liu, H. X. Zhao, C. Y. Chen, Z. B. Li, J. Lin, Y. Zhang, J. Zhang and X. H. Wan, *Chem. Commun.*, 2014, **50**, 1447-1450.
2. M. Lemmers, J. Sprakel, I. K. Voets, J. van der Gucht and M. A. C. Stuart, *Angew. Chem. Int. Ed.*, 2014, **50**, 708-711.

## 2、 Figure and Tables

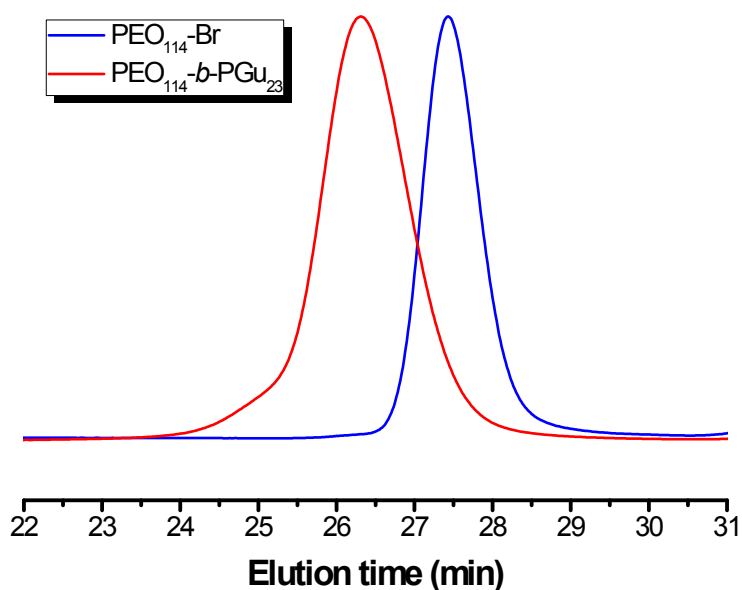

**Fig. S1**, GPC traces of  $\text{PEO}_{114}\text{-Br}$  macroinitiator and  $\text{PEO}_{114}\text{-}b\text{-PBG}_{23}$  diblock copolymers.

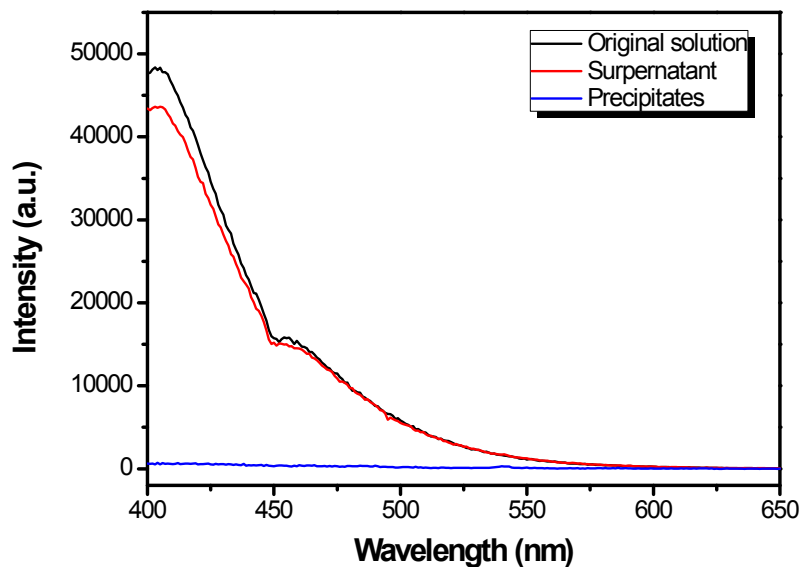

**Fig. S2**, Emission spectra of the original solution before centrifugation (-), the supernatant solution after centrifugation (-), and the re-dispersed precipitates after centrifugation (-) of TbW<sub>10</sub>/EuW<sub>10</sub>/Quinine = 50/1/5 excited 280nm. The concentration of TbW<sub>10</sub> is 1.75×10<sup>-3</sup> M and PEO<sub>114</sub>-*b*-PGu<sub>23</sub> is 6.85×10<sup>-4</sup>.

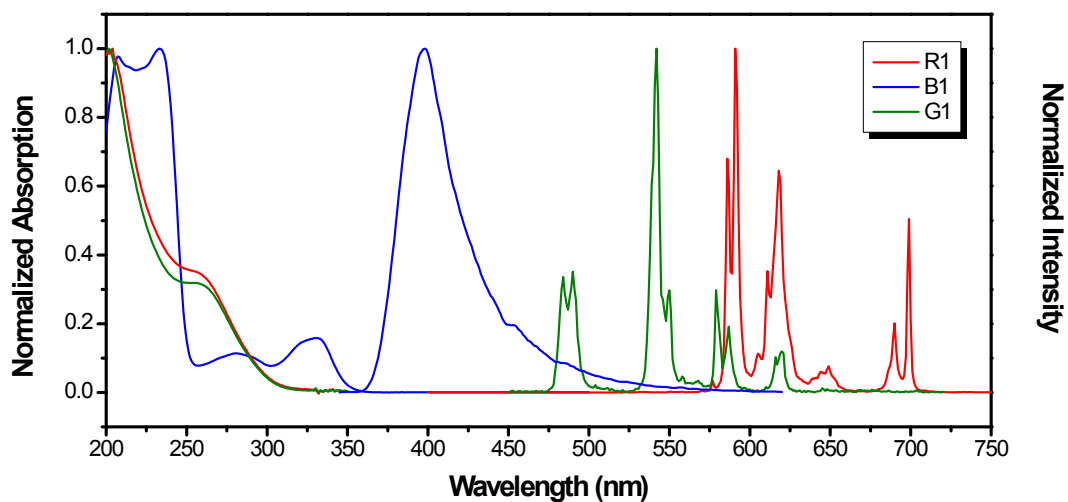

**Fig. S3**, Absorption and emission spectra of R1, G1, and B1 ( $\lambda_{\text{ex}} = 280 \text{ nm}$ ,  $\lambda_{\text{em}} = 400 \text{ nm}$ ) hybrid solutions. The excitation wavelength is 280 nm.

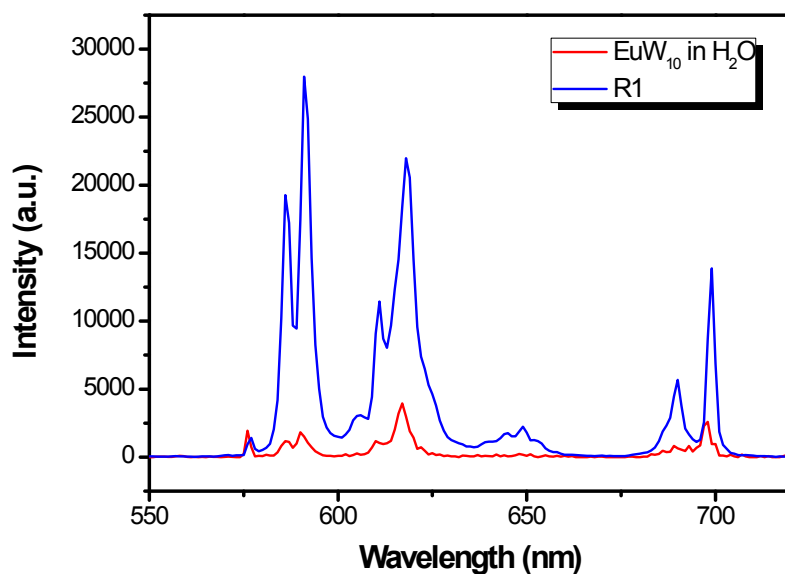

**Fig. S4**, Emission spectra of  $\text{EuW}_{10}$  in  $\text{H}_2\text{O}$  (-) and R1 primary solution (-) at an excitation wavelength of 280 nm.

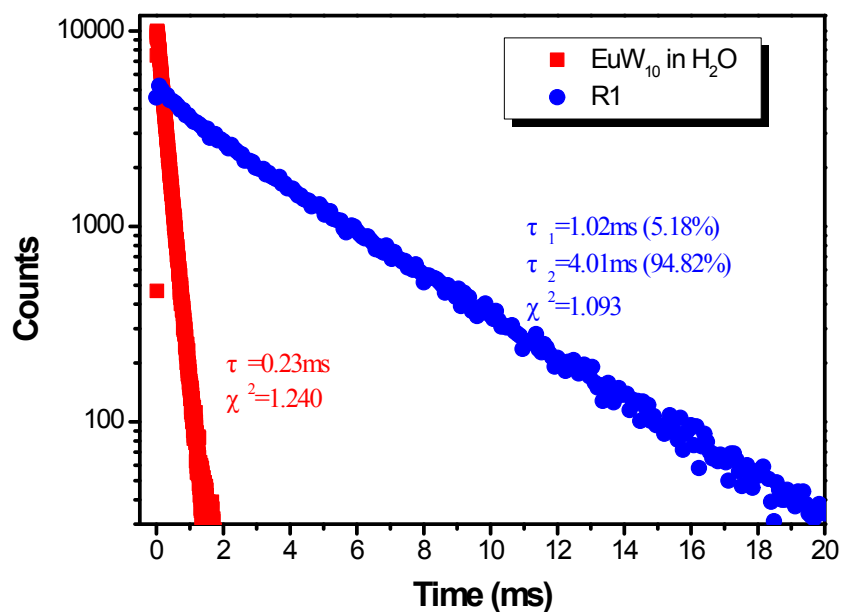

**Fig. S5**, Emission decay curves of  $\text{EuW}_{10}$  in  $\text{H}_2\text{O}$  (■) and R1 (●) at an excitation wavelength of 280 nm and monitored at 587 nm.

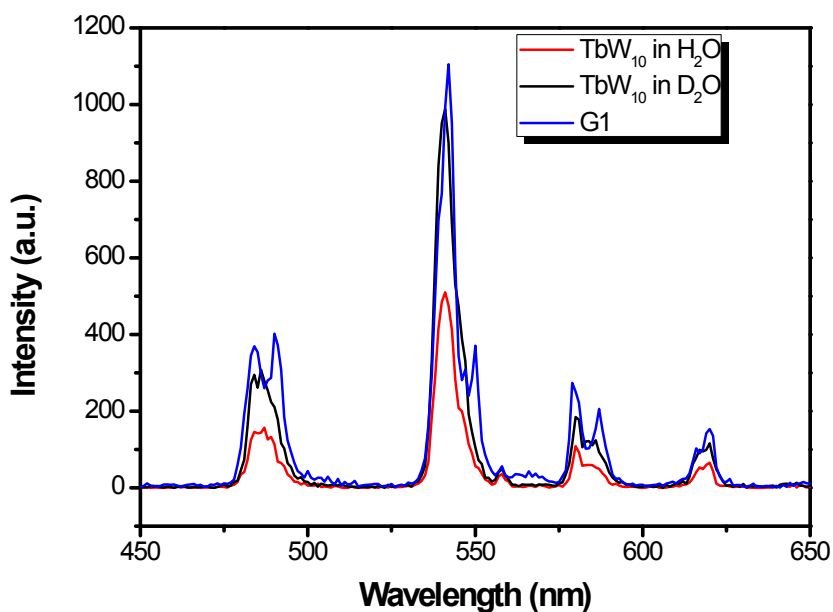

**Fig. S6**, Emission spectra of TbW<sub>10</sub> in H<sub>2</sub>O (-), D<sub>2</sub>O (-), and G1 primary solution (-) at an excitation wavelength of 280 nm.

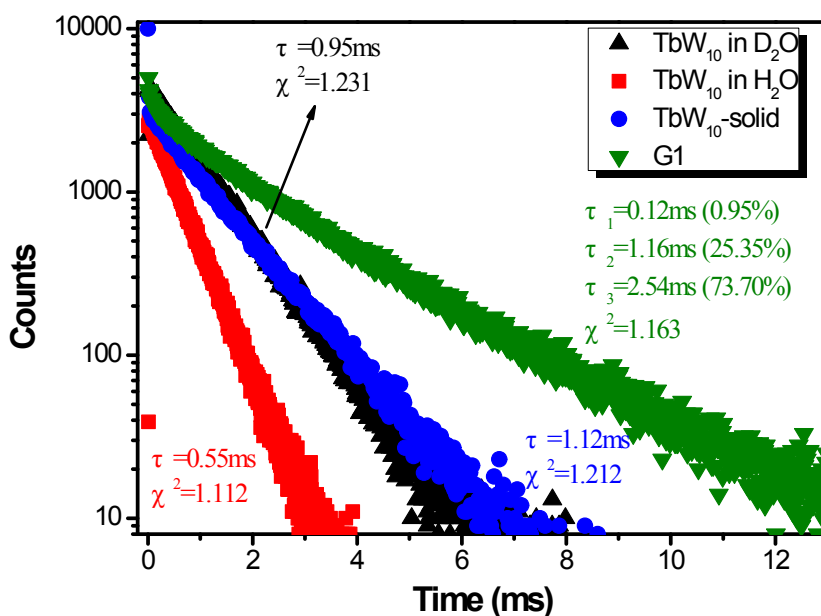

**Fig. S7**, Emission decay curves of TbW<sub>10</sub> in H<sub>2</sub>O (■), D<sub>2</sub>O (▲) and G1 (▼), and TbW<sub>10</sub> crystal (●) at an excitation wavelength of 280 nm. TbW<sub>10</sub> in H<sub>2</sub>O and D<sub>2</sub>O, and TbW<sub>10</sub> crystal was monitored at 542 nm, G1 was monitored at 587 nm.

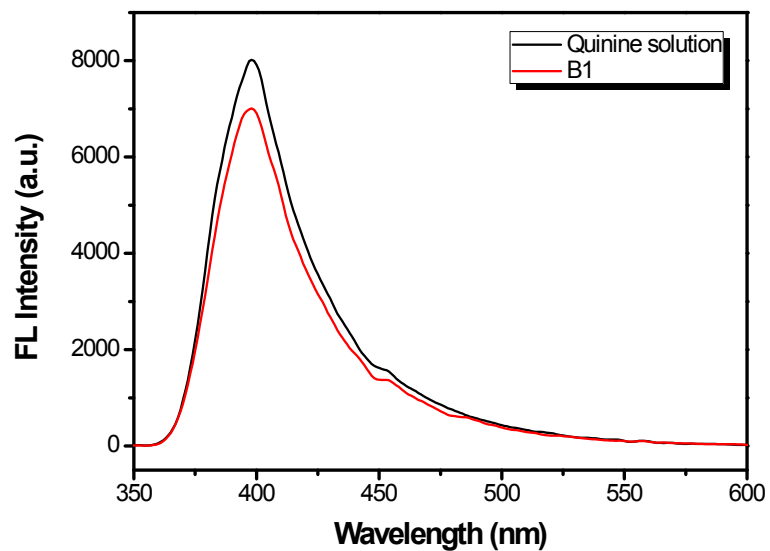

**Fig. S8**, Emission spectra of Quinine in H<sub>2</sub>O (-) and B1 primary solution (-) at an excitation wavelength of 280 nm.

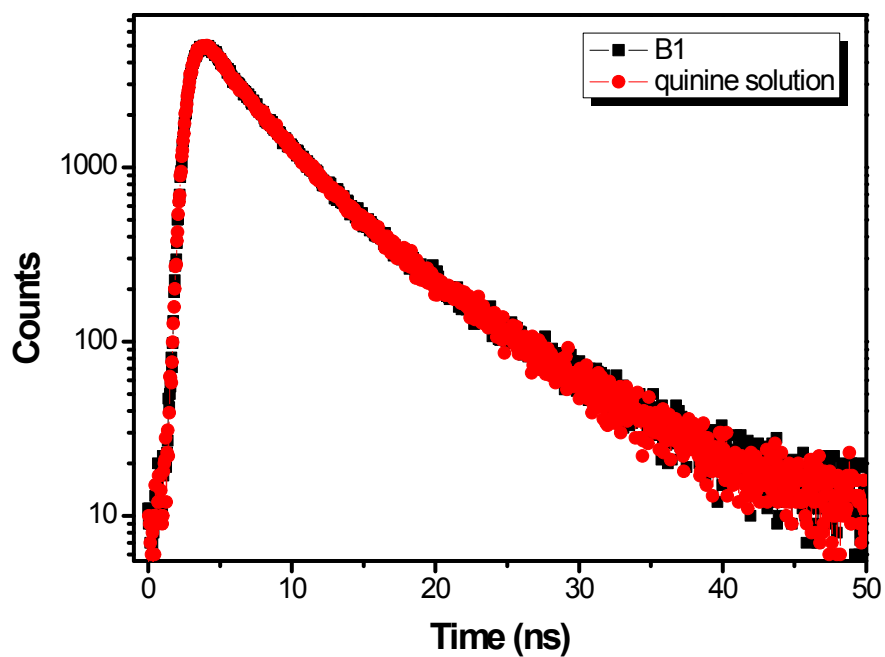

**Fig. S9**, Emission decay curves of B1 primary solution (■) and quinine solution (●) at an excitation

wavelength of 333 nm and monitored at 400 nm.

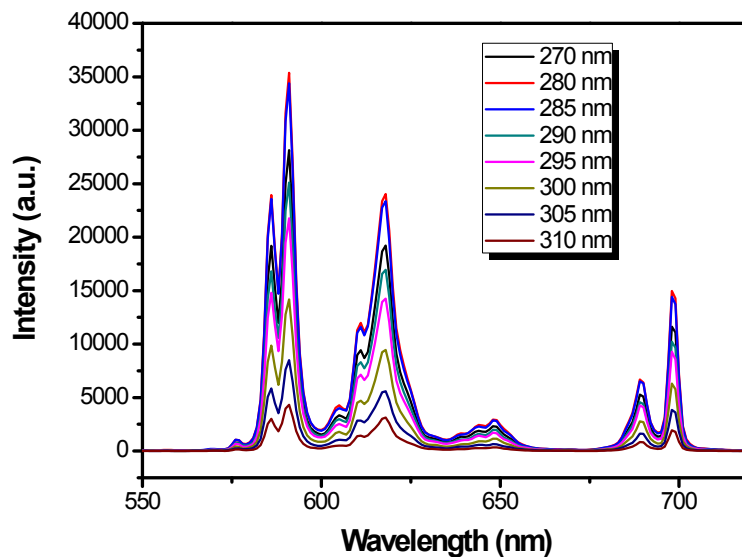

**Fig. S10**, Emission spectra of EuW<sub>10</sub> ( $3.50 \times 10^{-5}$  M) complexed with PEO<sub>114</sub>-*b*-PGu<sub>23</sub> ( $1.37 \times 10^{-5}$  M) upon different excitation wavelengths.

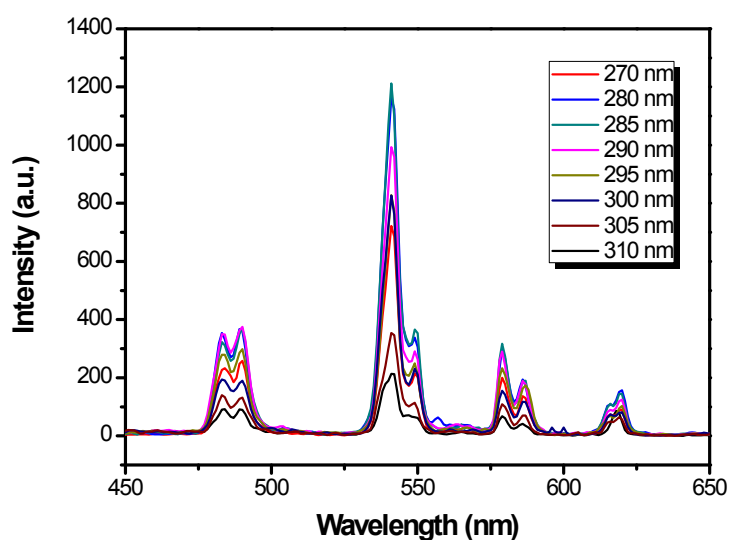

**Fig. S11**, Emission spectra of TbW<sub>10</sub> ( $3.50 \times 10^{-5}$  M) complexed with PEO<sub>114</sub>-*b*-PGu<sub>23</sub> ( $1.37 \times 10^{-5}$  M) upon different excitation wavelengths.



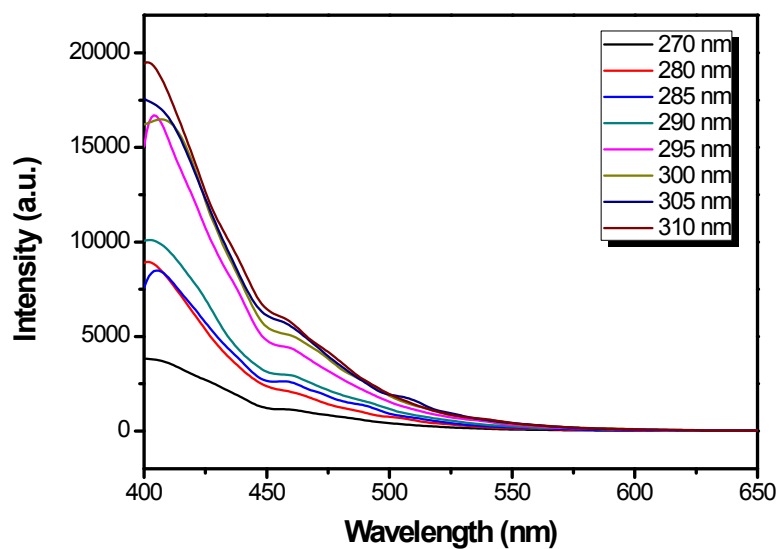

**Fig. S12**, Emission spectra of Quinine ( $3.50 \times 10^{-5}$  M) complexed with PEO<sub>114</sub>-*b*-PGu<sub>23</sub> ( $1.37 \times 10^{-5}$  M) upon different excitation wavelengths.

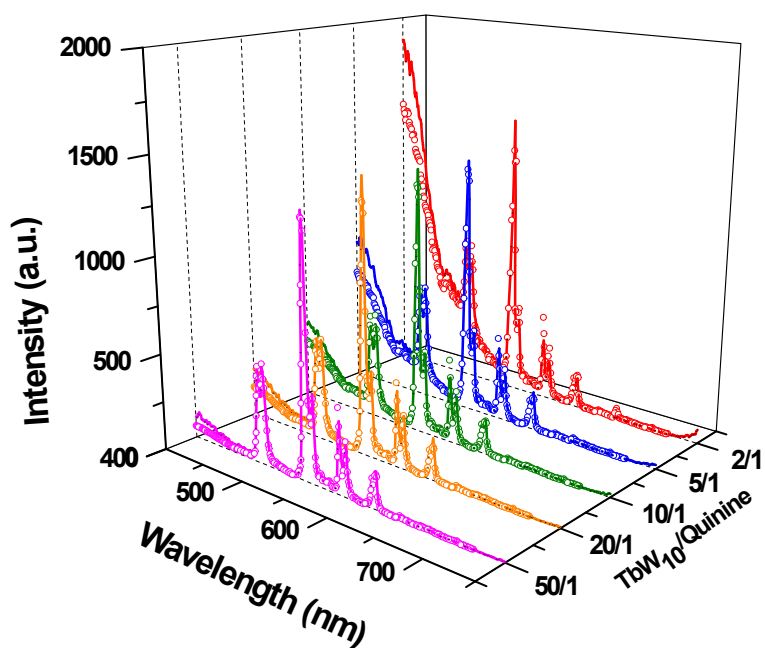

**Fig. S13**, Emission spectra of the hybrid solution mixtures TbW<sub>10</sub> - quinine series at different molar ratios at the excitation wavelength of 280 nm. Solid lines indicate the measured spectra and unfilled circles represent expected ones.

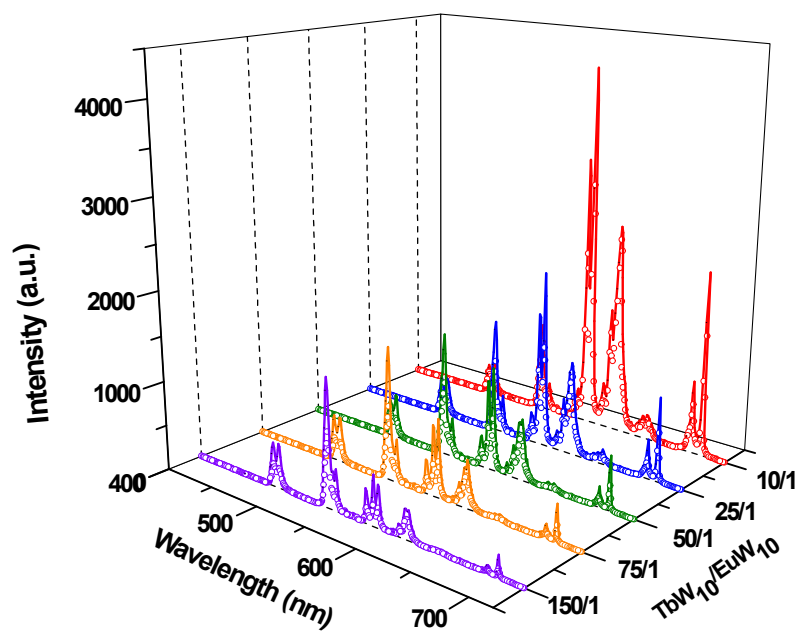

**Fig. S14**, Emission spectra of the hybrid solution mixtures  $\text{EuW}_{10}$  –  $\text{TbW}_{10}$  series at different molar ratios at the excitation wavelength of 280 nm. Solid lines indicate the measured spectra and unfilled circles represent expected ones.

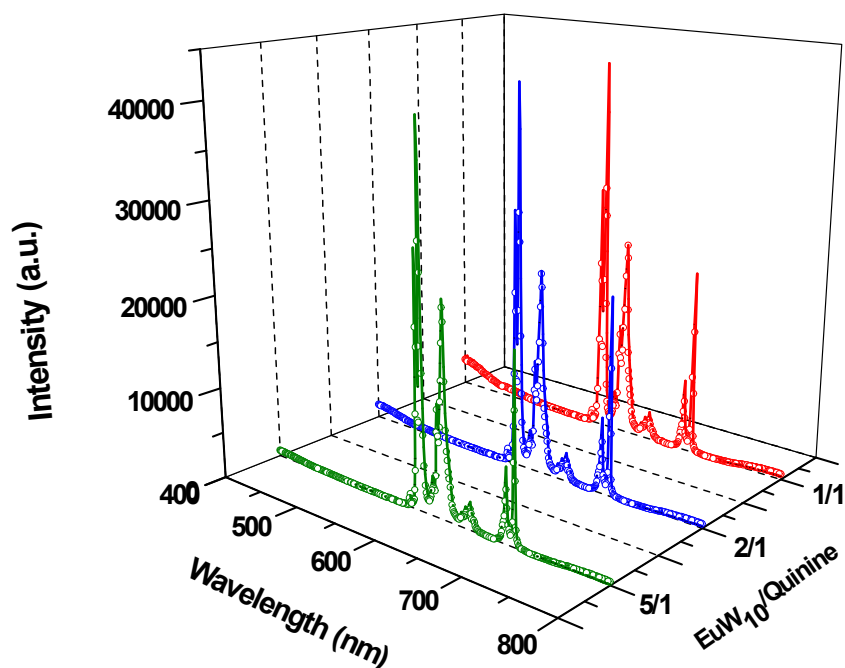

**Fig. S15**, Emission spectra of the hybrid solution mixtures  $\text{EuW}_{10}$  – Quinine series at different molar ratios at the excitation wavelength of 280 nm. Solid lines indicate the measured spectra and unfilled circles represent expected ones.

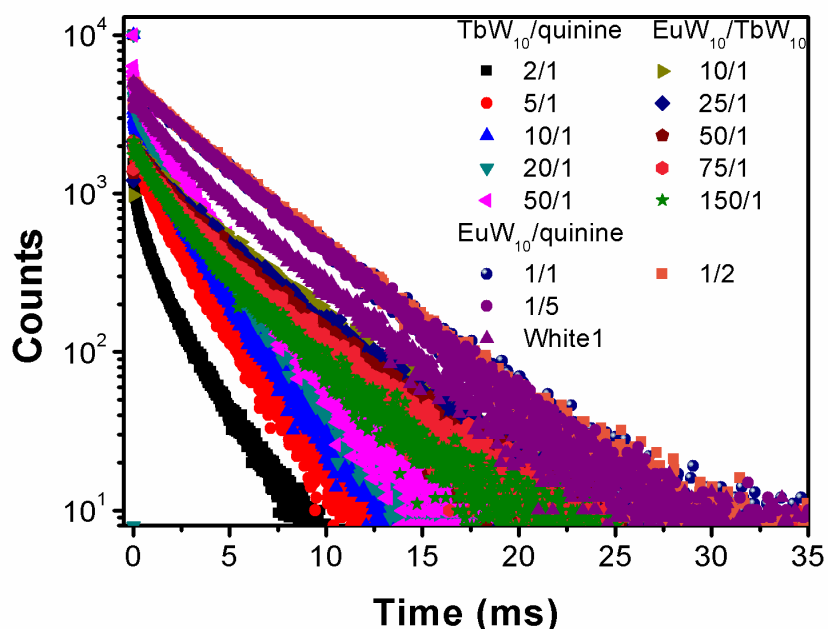

**Fig. S16**, Emission decay curves of  $\text{TbW}_{10}$  - quinine,  $\text{EuW}_{10}$  – quinine, and  $\text{TbW}_{10}$  –  $\text{EuW}_{10}$  series solutions at different ratios, and White1 solution excited at 280 nm and monitored at the co-emission wavelength 587 nm.

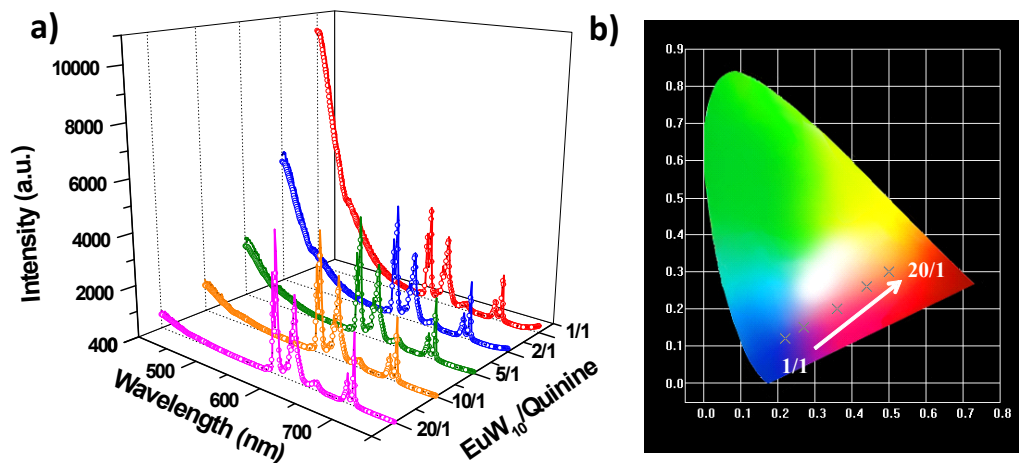

**Fig. S17,** a) Measured (solid line) and estimated (unfilled circles) emission spectra and b) Emission color coordinates of the EuW<sub>10</sub> – quinine series mixtures solutions at different ratios excited at 310nm.

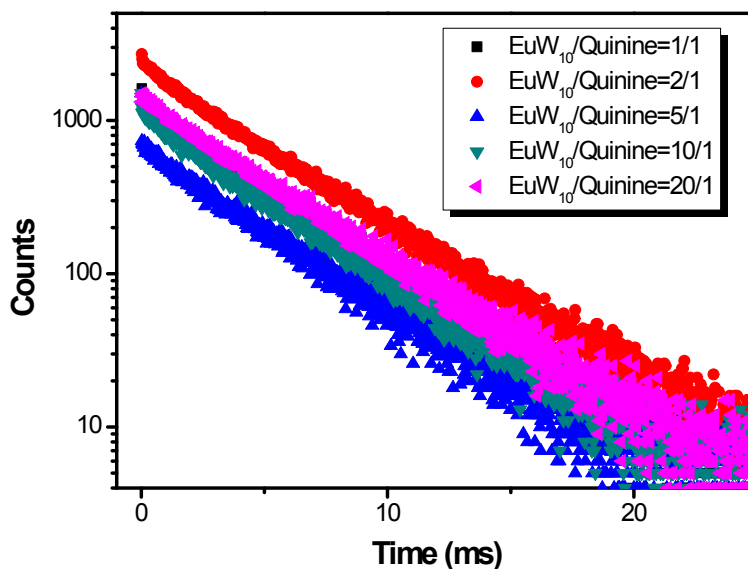

**Fig. S18,** Emission decay curves of EuW<sub>10</sub> – Quinine series solutions at different ratios excited at 310 nm and monitored at 587 nm.

**Table S1**, Fluorescent lifetimes and CIE chromaticity coordinates of EuW<sub>10</sub> – quinine series mixtures solutions at different ratios excited at 310 nm.

|                           | EuW <sub>10</sub> /Quinine |              |              |              |              |
|---------------------------|----------------------------|--------------|--------------|--------------|--------------|
|                           | 1/1                        | 2/1          | 5/1          | 10/1         | 20/1         |
| <b>τ<sub>1</sub> (ms)</b> | 0.843                      | 0.959        | 0.791        | 1.073        | 0.863        |
| <b>α<sub>1</sub> (%)</b>  | 3.30                       | 3.44         | 2.75         | 3.69         | 2.38         |
| <b>τ<sub>2</sub> (ms)</b> | 4.314                      | 4.364        | 4.215        | 4.239        | 4.324        |
| <b>α<sub>2</sub> (%)</b>  | 96.70                      | 96.56        | 97.25        | 96.31        | 97.62        |
| <b>CIE (estimation)</b>   | (0.22, 0.12)               | (0.27, 0.15) | (0.36, 0.21) | (0.44, 0.26) | (0.50, 0.31) |
| <b>CIE (experiment)</b>   | (0.22, 0.12)               | (0.27, 0.15) | (0.36, 0.20) | (0.44, 0.26) | (0.50, 0.31) |

**Table S2**, Fluorescent lifetimes of TbW<sub>10</sub> – quinine, EuW<sub>10</sub> – quinine, and TbW<sub>10</sub> – EuW<sub>10</sub> – quinine series mixtures solutions at different excitation wavelengths.

| λ <sub>ex</sub> (nm)      | TbW <sub>10</sub> /Quinine |       |       |       | EuW <sub>10</sub> /Quinine |       |       |       |       | TbW <sub>10</sub> / EuW <sub>10</sub> /Quinine |       |       |       |       |       |       |
|---------------------------|----------------------------|-------|-------|-------|----------------------------|-------|-------|-------|-------|------------------------------------------------|-------|-------|-------|-------|-------|-------|
|                           | 280                        | 290   | 300   | 310   | 280                        | 290   | 300   | 305   | 310   | 270                                            | 280   | 285   | 290   | 295   | 300   | 305   |
| <b>τ<sub>1</sub> (ms)</b> | 1.171                      | 1.134 | 1.136 | 0.671 | 0.948                      | 0.694 | 1.008 | 0.614 | 1.540 | 1.254                                          | 1.602 | 1.343 | 1.330 | 1.408 | 1.313 | 0.985 |
| <b>α<sub>1</sub> (%)</b>  | 25.52                      | 23.81 | 25.19 | 5.76  | 1.76                       | 1.31  | 2.26  | 1.36  | 3.89  | 10.35                                          | 16.83 | 15.71 | 12.71 | 16.03 | 14.46 | 8.35  |
| <b>τ<sub>2</sub> (ms)</b> | 2.570                      | 2.531 | 2.521 | 2.058 | 4.344                      | 4.318 | 4.380 | 4.313 | 4.450 | 4.155                                          | 4.385 | 4.367 | 4.173 | 4.311 | 4.195 | 3.715 |
| <b>α<sub>2</sub> (%)</b>  | 74.48                      | 76.19 | 74.81 | 94.24 | 98.24                      | 98.69 | 97.74 | 98.64 | 96.11 | 89.65                                          | 83.17 | 84.29 | 87.29 | 83.97 | 85.54 | 91.65 |

**Table S3**, ICP data of TbW<sub>10</sub> – EuW<sub>10</sub> series solution and White1. The concentration of the every solution was adjusted for precise measurement.

| Sample                                   | Tb<br>(μg/ml) | Eu<br>(μg/ml) |        |
|------------------------------------------|---------------|---------------|--------|
| TbW <sub>10</sub> /<br>EuW <sub>10</sub> | 10/1          | 56.3492       | 5.3669 |
|                                          | 25/1          | 67.3183       | 2.5538 |
|                                          | 50/1          | 48.6238       | 0.9091 |
|                                          | 75/1          | 59.0093       | 0.7512 |
|                                          | 150/1         | 136.2037      | 0.8746 |
| White1                                   | 52.1606       | 0.9281        |        |

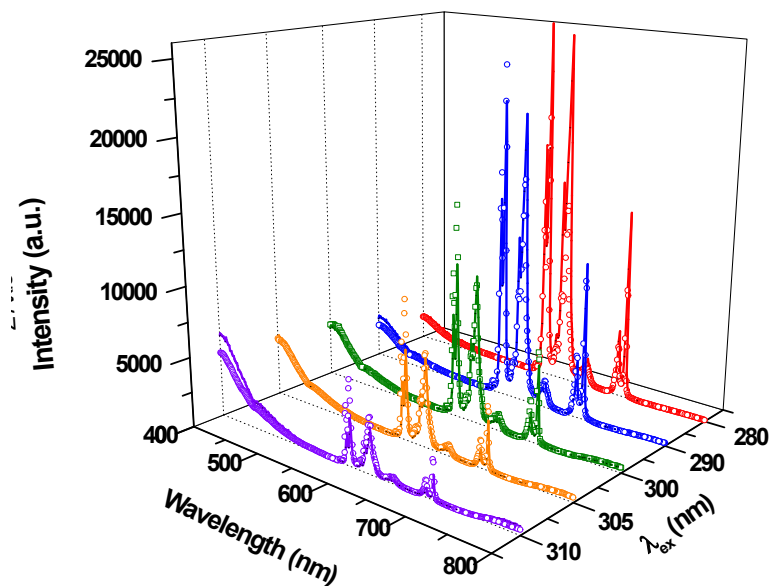

**Fig. S19**, Emission spectra of  $\text{EuW}_{10}/\text{quinine} = 3/1$  hybrid solution mixture upon different excitation wavelengths. Solid lines indicate the measured spectra and unfilled circles represent expected ones.

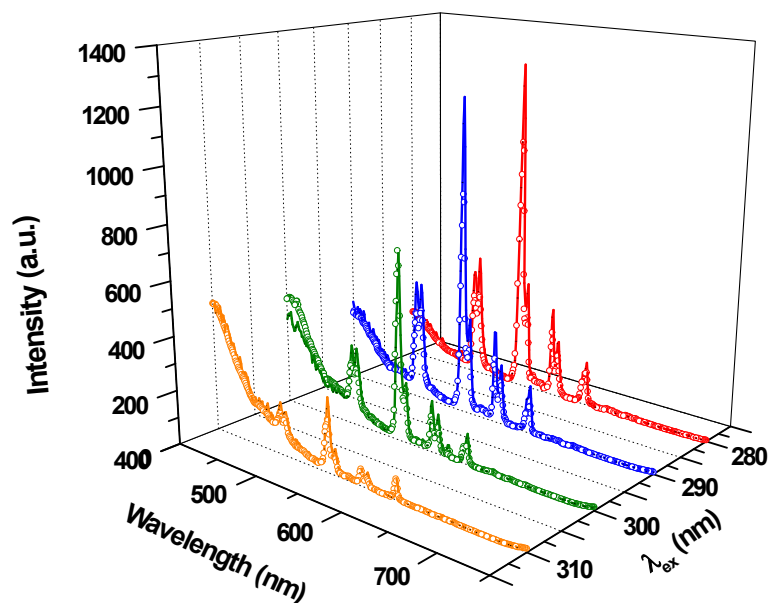

**Fig. S20**, Emission spectra of  $\text{TbW}_{10}/\text{quinine} = 30/1$  hybrid solution mixture upon different

excitation wavelengths. Solid lines indicate the measured spectra and unfilled circles represent expected ones.

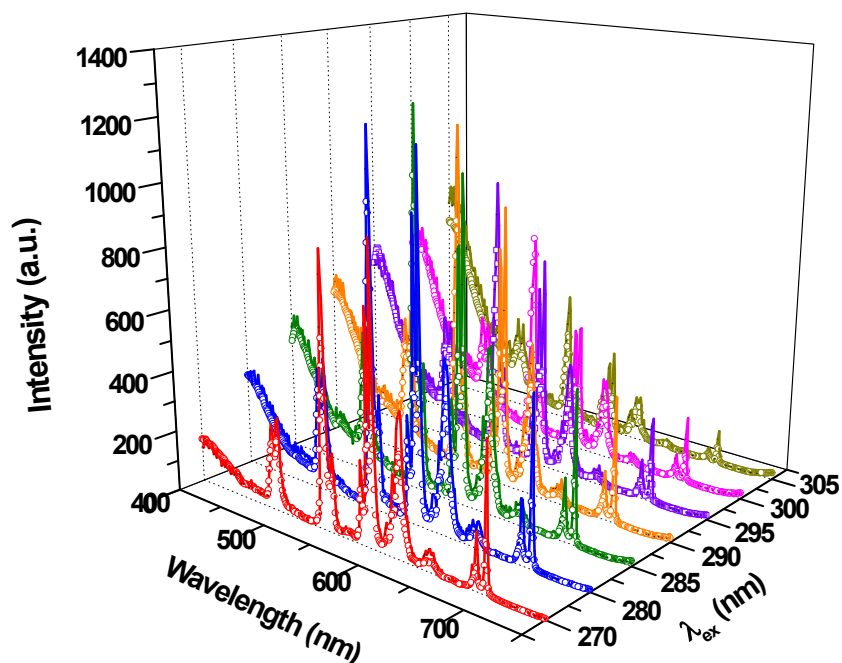

**Fig. S21**, Emission spectra of TbW<sub>10</sub>/EuW<sub>10</sub>/quinine = 50/1/3 hybrid solution mixture upon different excitation wavelengths. Solid lines indicate the measured spectra and unfilled circles represent expected ones.

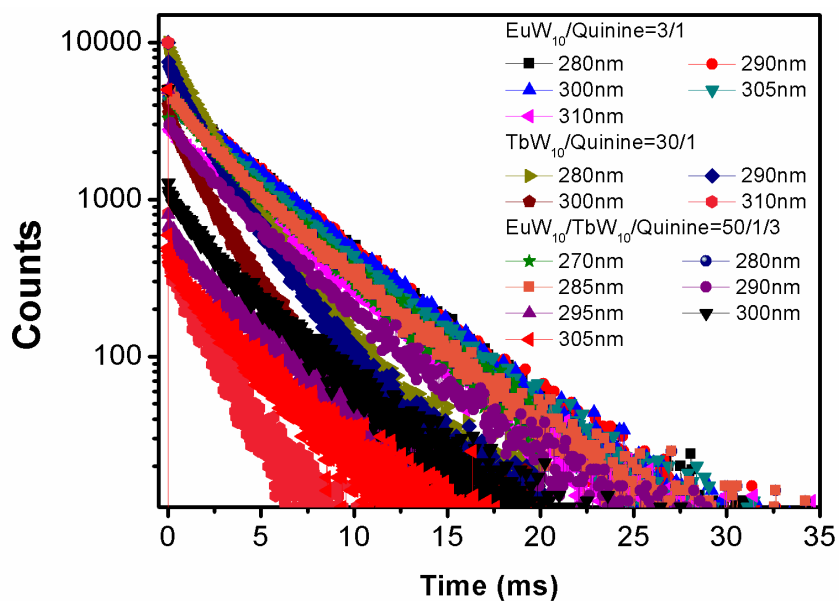

**Fig. S22**, Emission decay curves of  $\text{EuW}_{10}/\text{Quinine} = 3/1$ ,  $\text{TbW}_{10}/\text{Quinine} = 30/1$ , and  $\text{EuW}_{10}/\text{TbW}_{10}/\text{Quinine} = 50/1/3$  solutions excited at different Wavelengths and monitored at 587 nm.

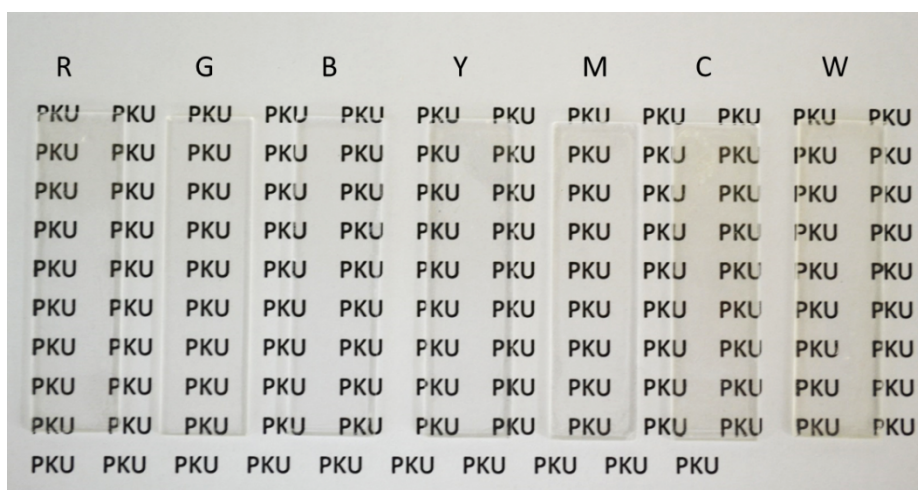

**Fig. S23**, Photographs of representative films under daylight.



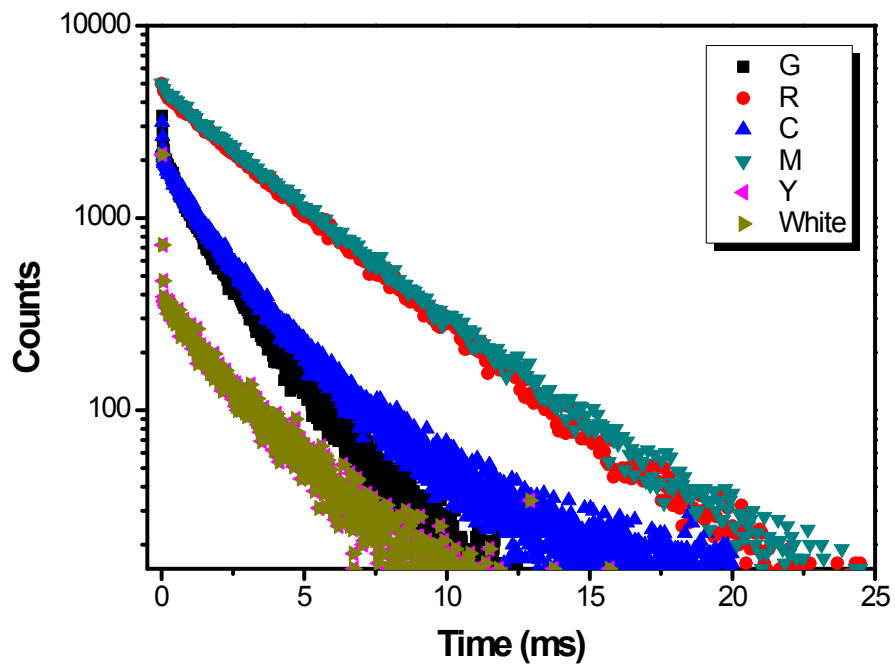

Fig. S24, Emission decay curves of representative films excited at 280 nm.
